# Supplementary material for: Long lasting insecticidal mosquito nets (LLINs) ownership, use and coverage following mass distribution campaign in Lake Victoria basin, Western Kenya
Source: Springer Nature journal article supplement (doi:10.1186/s12889-021-11062-7), 2021-06-02
Supplement: MOESM1 [file 19222412]

# HOUSEHOLD QUESTIONNAIRE ON LLINs USE –NYABONDO KENYA

## INTRODUCTION

“Hello, my name is .....from ICIPE. I/we are carrying out a survey on LLINs use in this area. I hope you can spare some of your time by helping us answer some few questions. Your participation will enable us to better understand the malaria situation and LLINs use in your community. I hope that you will feel free to respond to few questions and other issues that involve your household. You are not under obligation to participate in the study, but it is my desire that you do so. All information received from you will be strictly confidential and will be stored and used safely for the intended purpose. Do you agree?

Yes\_\_\_\_\_

No\_\_\_\_\_

(If yes, thank the respondent and proceed to the rest of the questionnaire).

NB: In the event that information is not made available after repeated visits please fill the box below and return the questionnaire.

| <b>SECTION 1 : IDENTIFICATION</b> |                                     |  |
|-----------------------------------|-------------------------------------|--|
| 1                                 | Date of interview/visit             |  |
| 2                                 | Village name/code                   |  |
| 3                                 | Household number (if list provided) |  |
| 4                                 | Name of interviewer                 |  |
| 5                                 | Name of respondent                  |  |
| 6                                 | Gender of Respondent                |  |
| 7                                 | Number of occupants                 |  |
| 8                                 | Number of Nets                      |  |

### 9. Highest level of education attained

|   |                                  |  |
|---|----------------------------------|--|
| 1 | Primary school (Not completed)   |  |
| 2 | Primary school (Completed)       |  |
| 3 | Secondary school (Not completed) |  |
| 4 | Secondary school (Completed)     |  |
| 5 | University/ college              |  |
| 6 | Informal                         |  |

10. Main Occupation

|   |                     |  |
|---|---------------------|--|
| 1 | Student             |  |
| 2 | Farming             |  |
| 3 | Self business       |  |
| 4 | Salaried Employment |  |
| 5 | Unemployed          |  |
| 6 | Others (Specify)    |  |

11. What are the three most frequently occurring diseases in your household? –in order of severity

1. -----
2. -----
3. -----

12. When was the last time a member in your household had malaria?

|   | <b>When</b>           | <b>Tick</b> |
|---|-----------------------|-------------|
| 1 | A weeks ago           |             |
|   | Two weeks ago         |             |
| 2 | One month ago         |             |
| 3 | Two months ago        |             |
| 4 | Over Three months ago |             |
| 5 | Can't remember        |             |
| 6 | Any Other (Specify)   |             |

13. What immediate action did you take when one of your family member suffered malaria

|   | <b>Action Taken (Within 24Hrs)</b> | <b>Tick</b> |
|---|------------------------------------|-------------|
| 1 | Visited a local HF/Clinic          |             |
| 2 | Visited a traditional healer       |             |
| 3 | Bought drugs from general shop     |             |
| 4 | Bought drugs from chemist          |             |
| 5 | Took traditional herbs             |             |
| 6 | Other (Specify)                    |             |
| 7 |                                    |             |

14. What are the symptoms and signs of malaria you are aware of? (*Multiple answers possible*)

|   | <b>Symptoms/ signs</b> | <b>Tick</b> |
|---|------------------------|-------------|
| 1 | Fever                  |             |
| 2 | Feeling cold           |             |
| 3 | Headache               |             |
| 4 | Vomiting               |             |
| 5 | Diarrhoea              |             |
| 6 | General body weakness  |             |
| 7 | Loss of appetite       |             |
| 8 | Body pain/joint pain   |             |



20. If Yes, what are some of the ways of protecting your household/family from malaria/Mosquito bite? Indicate how often you apply each methods and rank them in order of effectiveness (*Tick accordingly as they are mentioned*).

**Codes:**      **Application:**    1.Daily                  2.Weekly                  3. Fortnightly    4. Monthly                  5. More than monthly

**Effectiveness:**    1. Effective                  2. Not so effective                  3. Not effective at all

|   | Method                                | Methods Known to you ( <i>tick</i> ) | Methods Current Applying ( <i>tick</i> ) | Application frequency ( <i>Prompt</i> ) | Effectiveness ( <i>Prompt</i> ) |
|---|---------------------------------------|--------------------------------------|------------------------------------------|-----------------------------------------|---------------------------------|
| 1 | Use of mosquito net-untreated         |                                      |                                          |                                         |                                 |
| 2 | Use of treated mosquito net [LLNs]    |                                      |                                          |                                         |                                 |
| 3 | Use of insecticide spray              |                                      |                                          |                                         |                                 |
| 4 | Taking preventive medicine            |                                      |                                          |                                         |                                 |
| 5 | Screen windows and doors              |                                      |                                          |                                         |                                 |
| 6 | Light the fire/coils                  |                                      |                                          |                                         |                                 |
| 7 | Apply mosquito repellents to the skin |                                      |                                          |                                         |                                 |
| 8 | Use traditional Methods (Specify)     |                                      |                                          |                                         |                                 |
| 9 | Others (Specify)                      |                                      |                                          |                                         |                                 |

21. Do you have a Bed net [LLNs] in your household? (Should be asked only if Bednets have not been mentioned before)

|    |     |  |    |  |
|----|-----|--|----|--|
| 1. | Yes |  | NO |  |
|----|-----|--|----|--|

22. How were your nets acquired, their colour and current condition

|   | How acquired (Code) | Colour | When acquired | Current Condition |
|---|---------------------|--------|---------------|-------------------|
| 1 |                     |        |               |                   |
| 2 |                     |        |               |                   |
| 3 |                     |        |               |                   |
| 4 |                     |        |               |                   |
| 5 |                     |        |               |                   |
| 6 |                     |        |               |                   |
| 7 |                     |        |               |                   |

**How acquired :** 1).From a health facility    2). From a Shop/Retail market    3). From mass distribution campaign  
4). From a relative/NGO/CBO

**When acquired :** 1). Less than 3 months ago    2). Between 3-6 months ago    3). Between 6-12 months ago  
-----4).More than one year ago

**Current condition :** 1). Good (clean & no holes)    2). Average    3) .Bad (Dirty, torn out with holes)

23. Did you sleep under LLNs last night

|    |     |  |   |    |  |   |        |  |
|----|-----|--|---|----|--|---|--------|--|
| 1. | Yes |  | 2 | NO |  | 3 | No Net |  |
|----|-----|--|---|----|--|---|--------|--|

24. In the last one week, how often have you slept under insecticide treated net

|   | <b>How often</b>         | <b>Tick</b> |
|---|--------------------------|-------------|
| 1 | Only Once                |             |
| 2 | Regularly-More than once |             |
| 3 | Always                   |             |
| 4 | Never                    |             |
| 5 | No Net                   |             |

25. What do you think are the benefits of sleeping under a bednet? (*Multiple answers, don't prompt*)

|   | <b>Reasons</b>                      | <b>Tick</b> |
|---|-------------------------------------|-------------|
| 1 | Don't get bitten by Mosquitoes      |             |
| 2 | Don't get malaria                   |             |
| 3 | Don't get bothered by other insects |             |
| 4 | Its warmer                          |             |
| 5 | None                                |             |
| 6 | Don't know                          |             |
| 7 | Others (Specify)                    |             |

----- **END** -----

**(Thank the respondent for sparing his/her time to participate).**
